# Supplementary material
Source: Royal Society of Chemistry journal article supplement (doi:10.1039/d5lc01180a)
Supplement: d5lc01180a1.pdf [file d5lc01180a1.pdf]

| Initial values |       | Final values |           |            |           |           |           |            |           |           |           |
|----------------|-------|--------------|-----------|------------|-----------|-----------|-----------|------------|-----------|-----------|-----------|
|                |       | $r = 0$      |           | $r = 0.25$ |           | $r = 0.5$ |           | $r = 0.75$ |           | $r = 1.0$ |           |
| $g_{ext}$      | $l_h$ | $n$          | $g_{ext}$ | $n$        | $g_{ext}$ | $n$       | $g_{ext}$ | $n$        | $g_{ext}$ | $n$       | $g_{ext}$ |
| 100            | 100   | 14           | 100       | 14         | 102       | 14        | 103       | 14         | 105       | 15        | 94        |
| 100            | 200   | 9            | 100       | 9          | 105       | 9         | 110       | 10         | 86        | 10        | 91        |
| 100            | 300   | 7            | 75        | 7          | 84        | 7         | 94        | 7          | 103       | 7         | 113       |
| 100            | 400   | 5            | 100       | 5          | 117       | 5         | 133       | 6          | 71        | 6         | 86        |
| 200            | 100   | 9            | 200       | 9          | 203       | 9         | 205       | 9          | 208       | 9         | 210       |
| 200            | 200   | 7            | 175       | 7          | 181       | 7         | 188       | 7          | 194       | 7         | 200       |
| 200            | 300   | 5            | 200       | 5          | 213       | 5         | 225       | 5          | 238       | 6         | 171       |
| 200            | 400   | 4            | 200       | 4          | 220       | 4         | 240       | 5          | 150       | 5         | 167       |
| 300            | 100   | 7            | 275       | 7          | 278       | 7         | 281       | 7          | 284       | 7         | 288       |
| 300            | 200   | 5            | 300       | 5          | 308       | 5         | 317       | 5          | 325       | 5         | 333       |
| 300            | 300   | 4            | 300       | 4          | 315       | 4         | 330       | 4          | 345       | 5         | 250       |
| 300            | 400   | 3            | 350       | 3          | 375       | 4         | 240       | 4          | 260       | 4         | 280       |
| 400            | 100   | 5            | 400       | 5          | 404       | 5         | 408       | 5          | 413       | 5         | 417       |
| 400            | 200   | 4            | 400       | 4          | 410       | 4         | 420       | 4          | 430       | 4         | 440       |
| 400            | 300   | 3            | 450       | 3          | 469       | 4         | 330       | 4          | 345       | 4         | 360       |
| 400            | 400   | 3            | 350       | 3          | 375       | 3         | 400       | 3          | 425       | 3         | 450       |

\* Hydrogel channel length: 3,000  $\mu m$
