# Supplementary material
Source: Royal Society of Chemistry journal article supplement (doi:10.1039/d5lc01180a)
Supplement: d5lc01180a4.pdf [file d5lc01180a4.pdf]

# Interface between microposts ( $\phi=0.5$ )

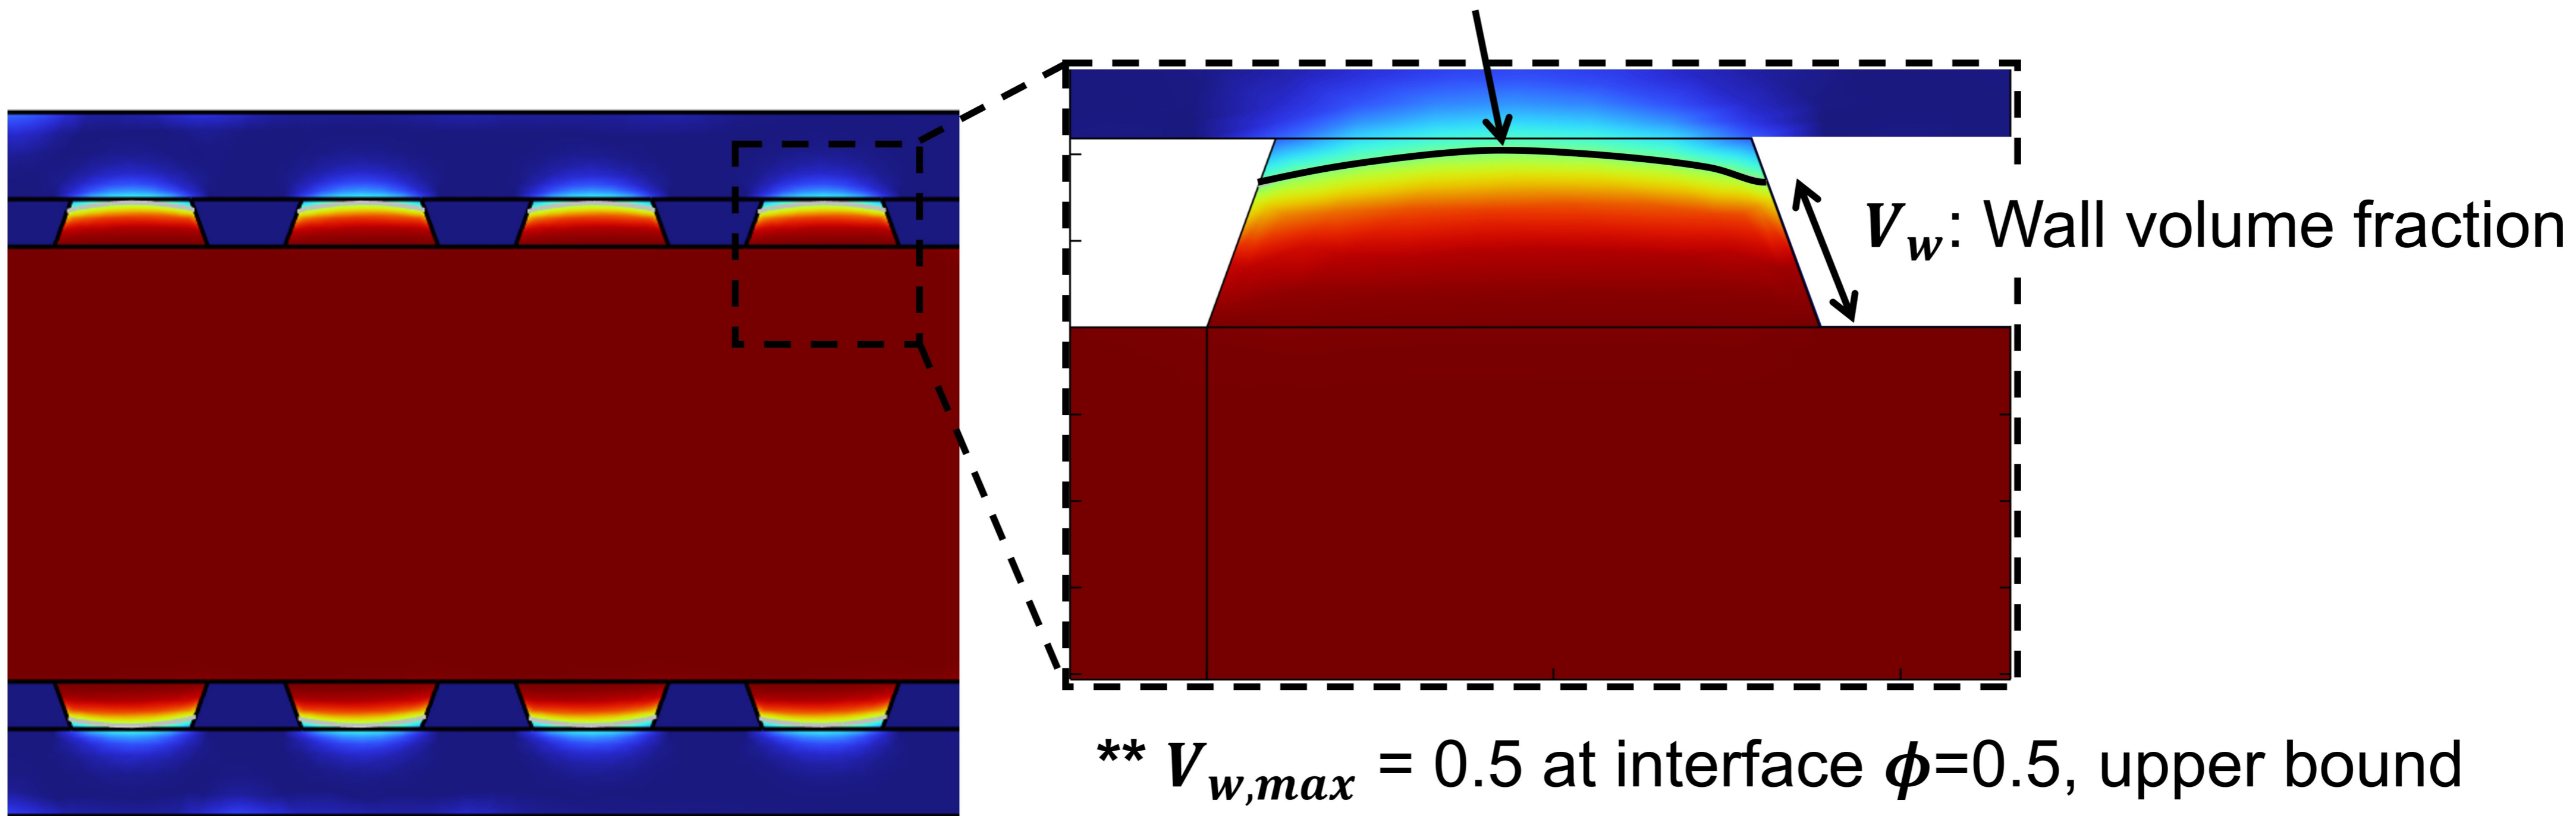

\*\*  $V_{w,max} = 0.5$  at interface  $\phi=0.5$ , upper bound

\*\*  $V_i = V_{w,avg}/V_{w,max}$ , Normalized volume fraction
