# Supplementary material
Source: Royal Society of Chemistry journal article supplement (doi:10.1039/d5lc01180a)

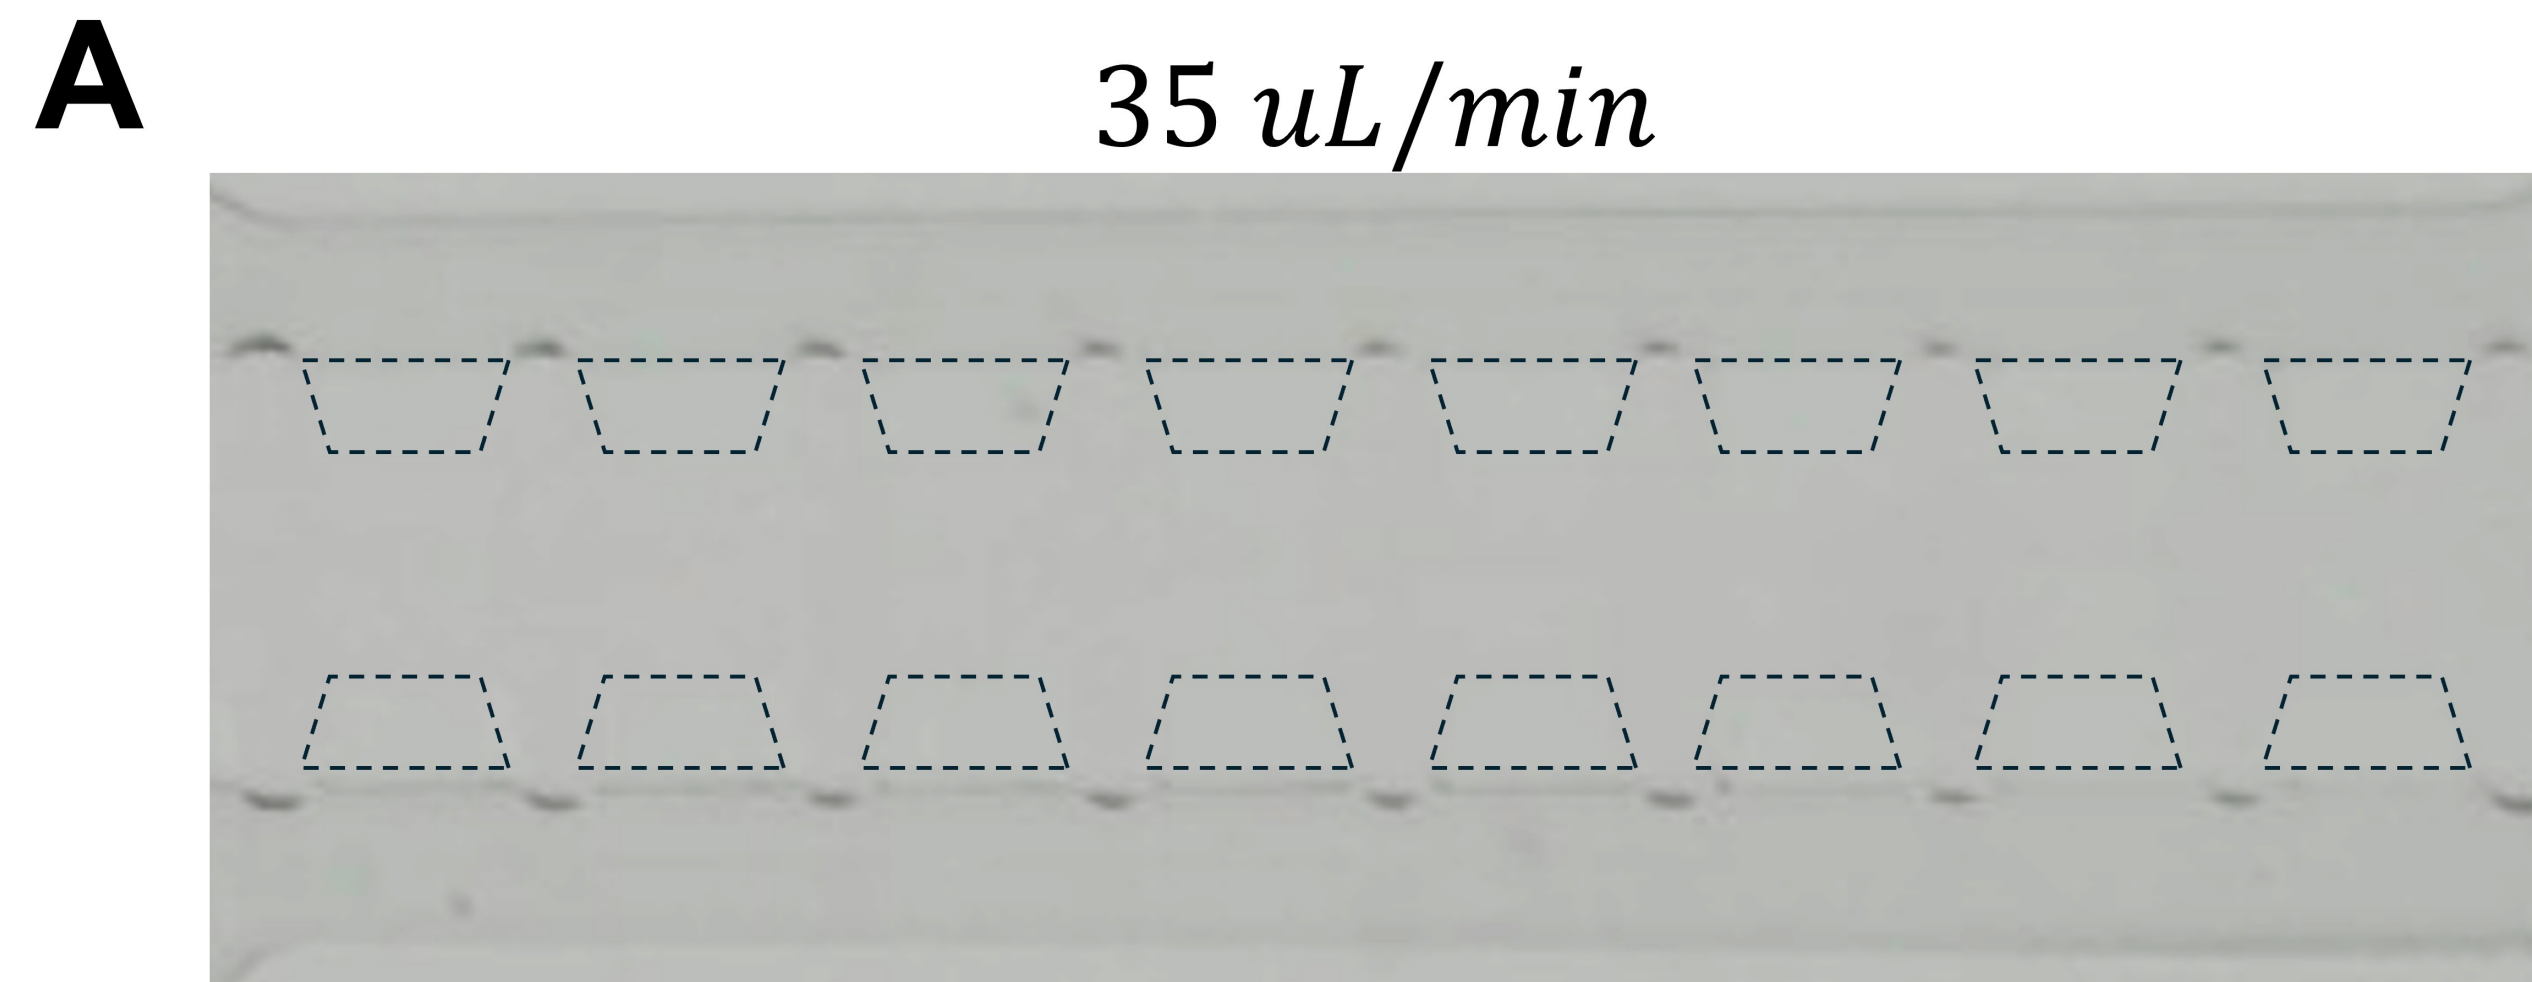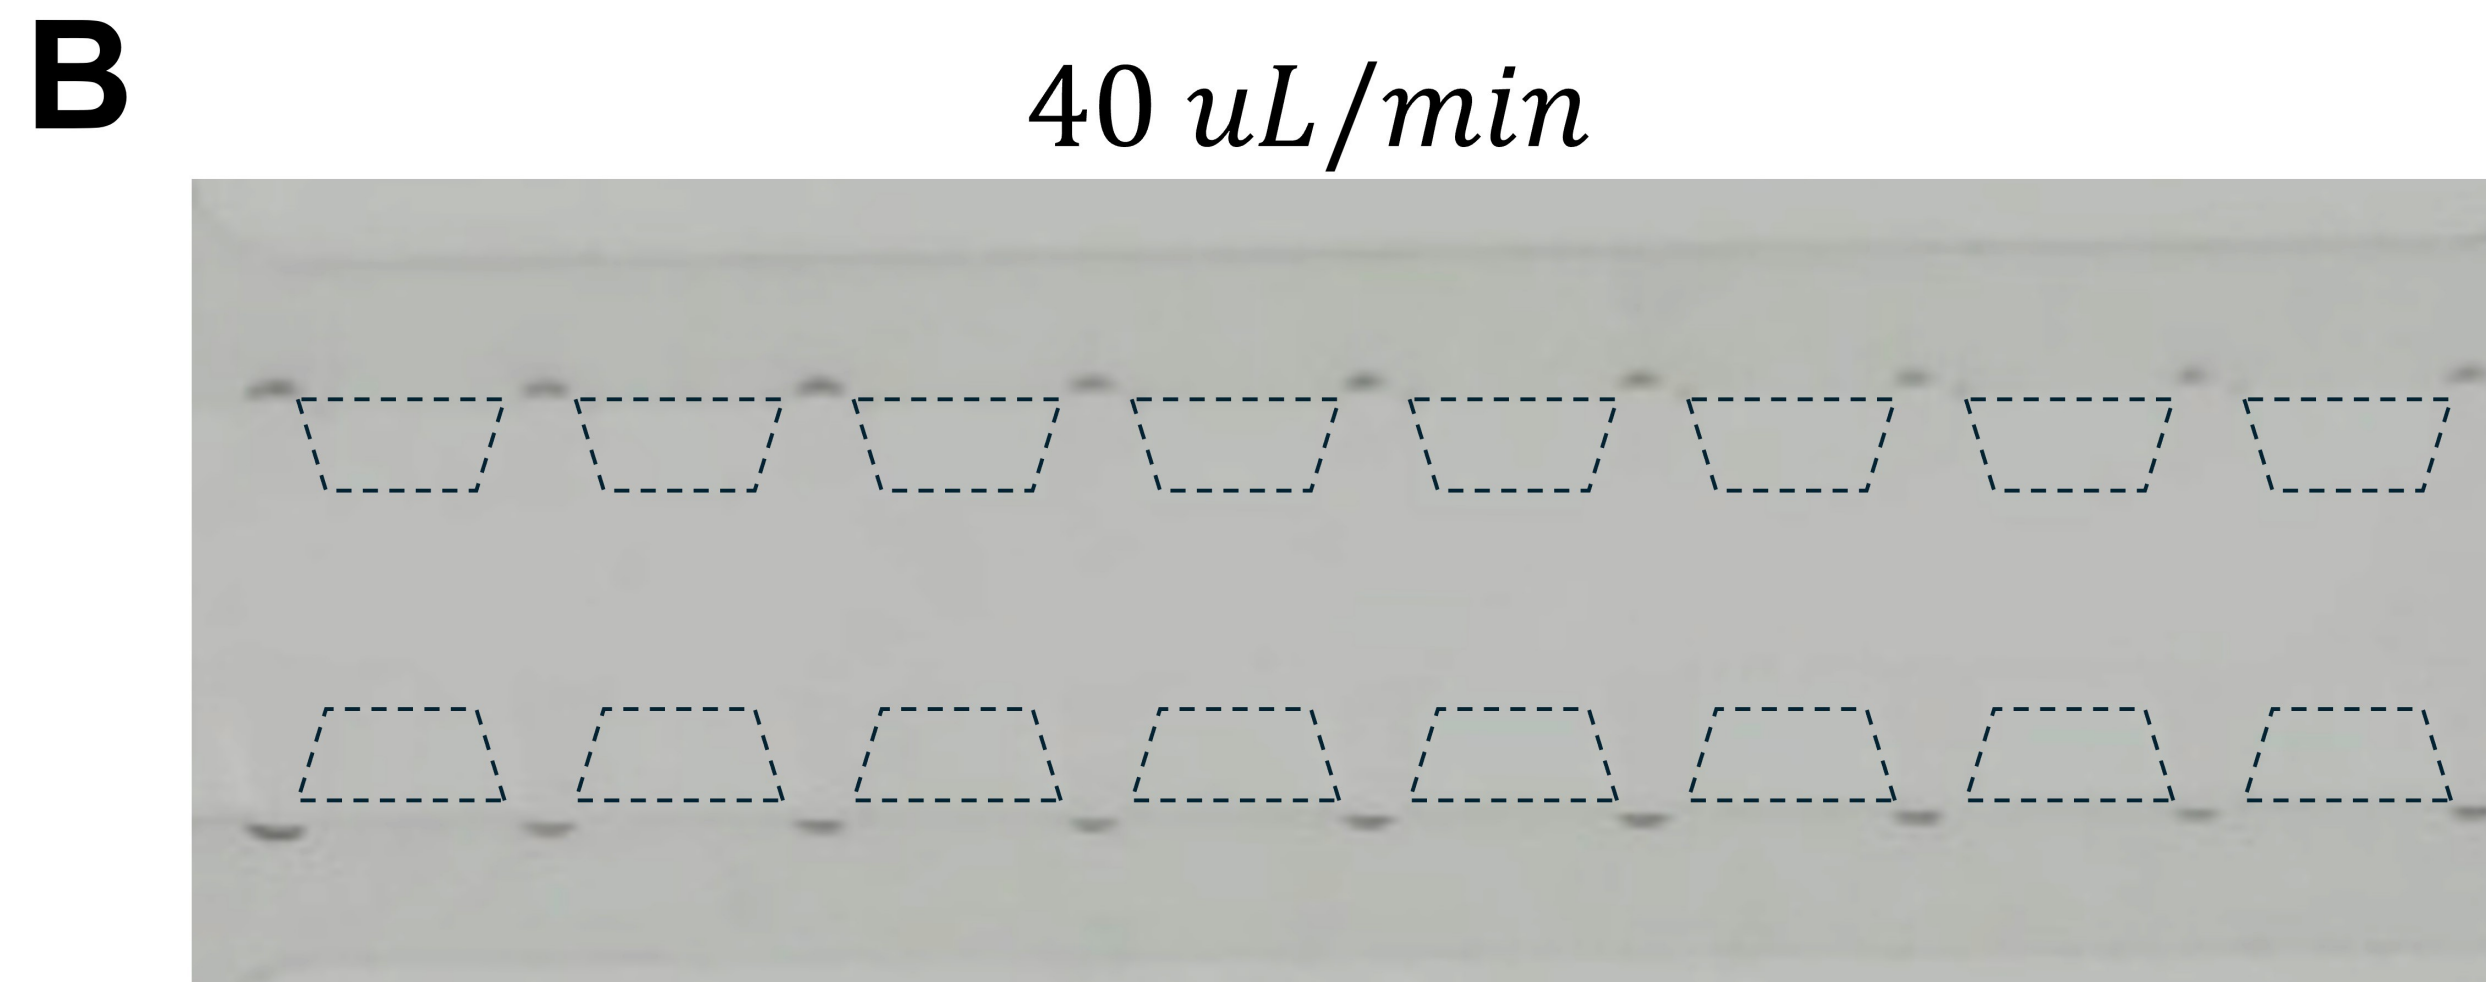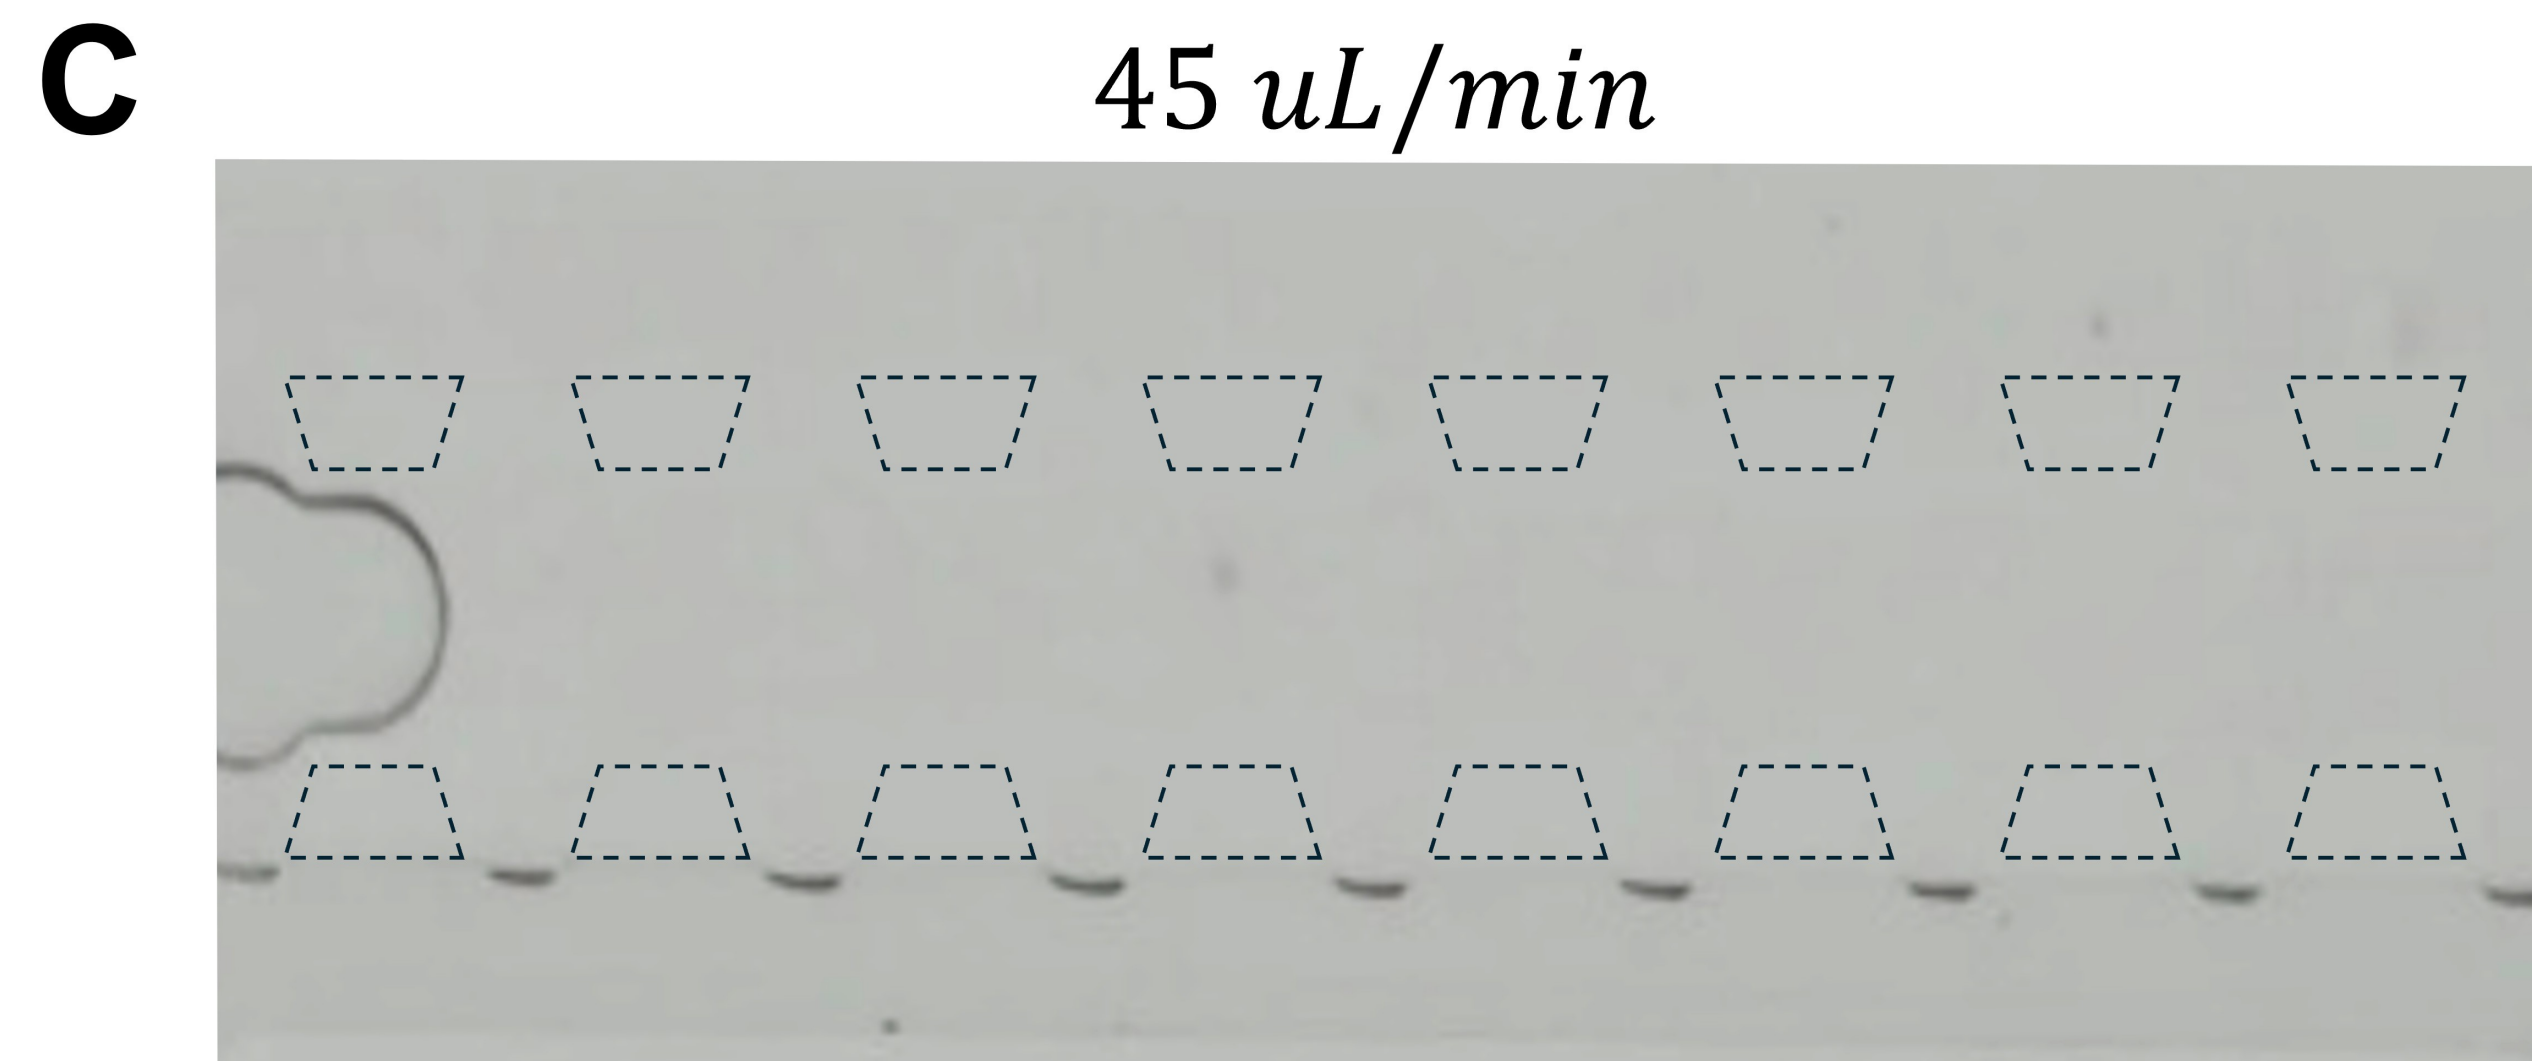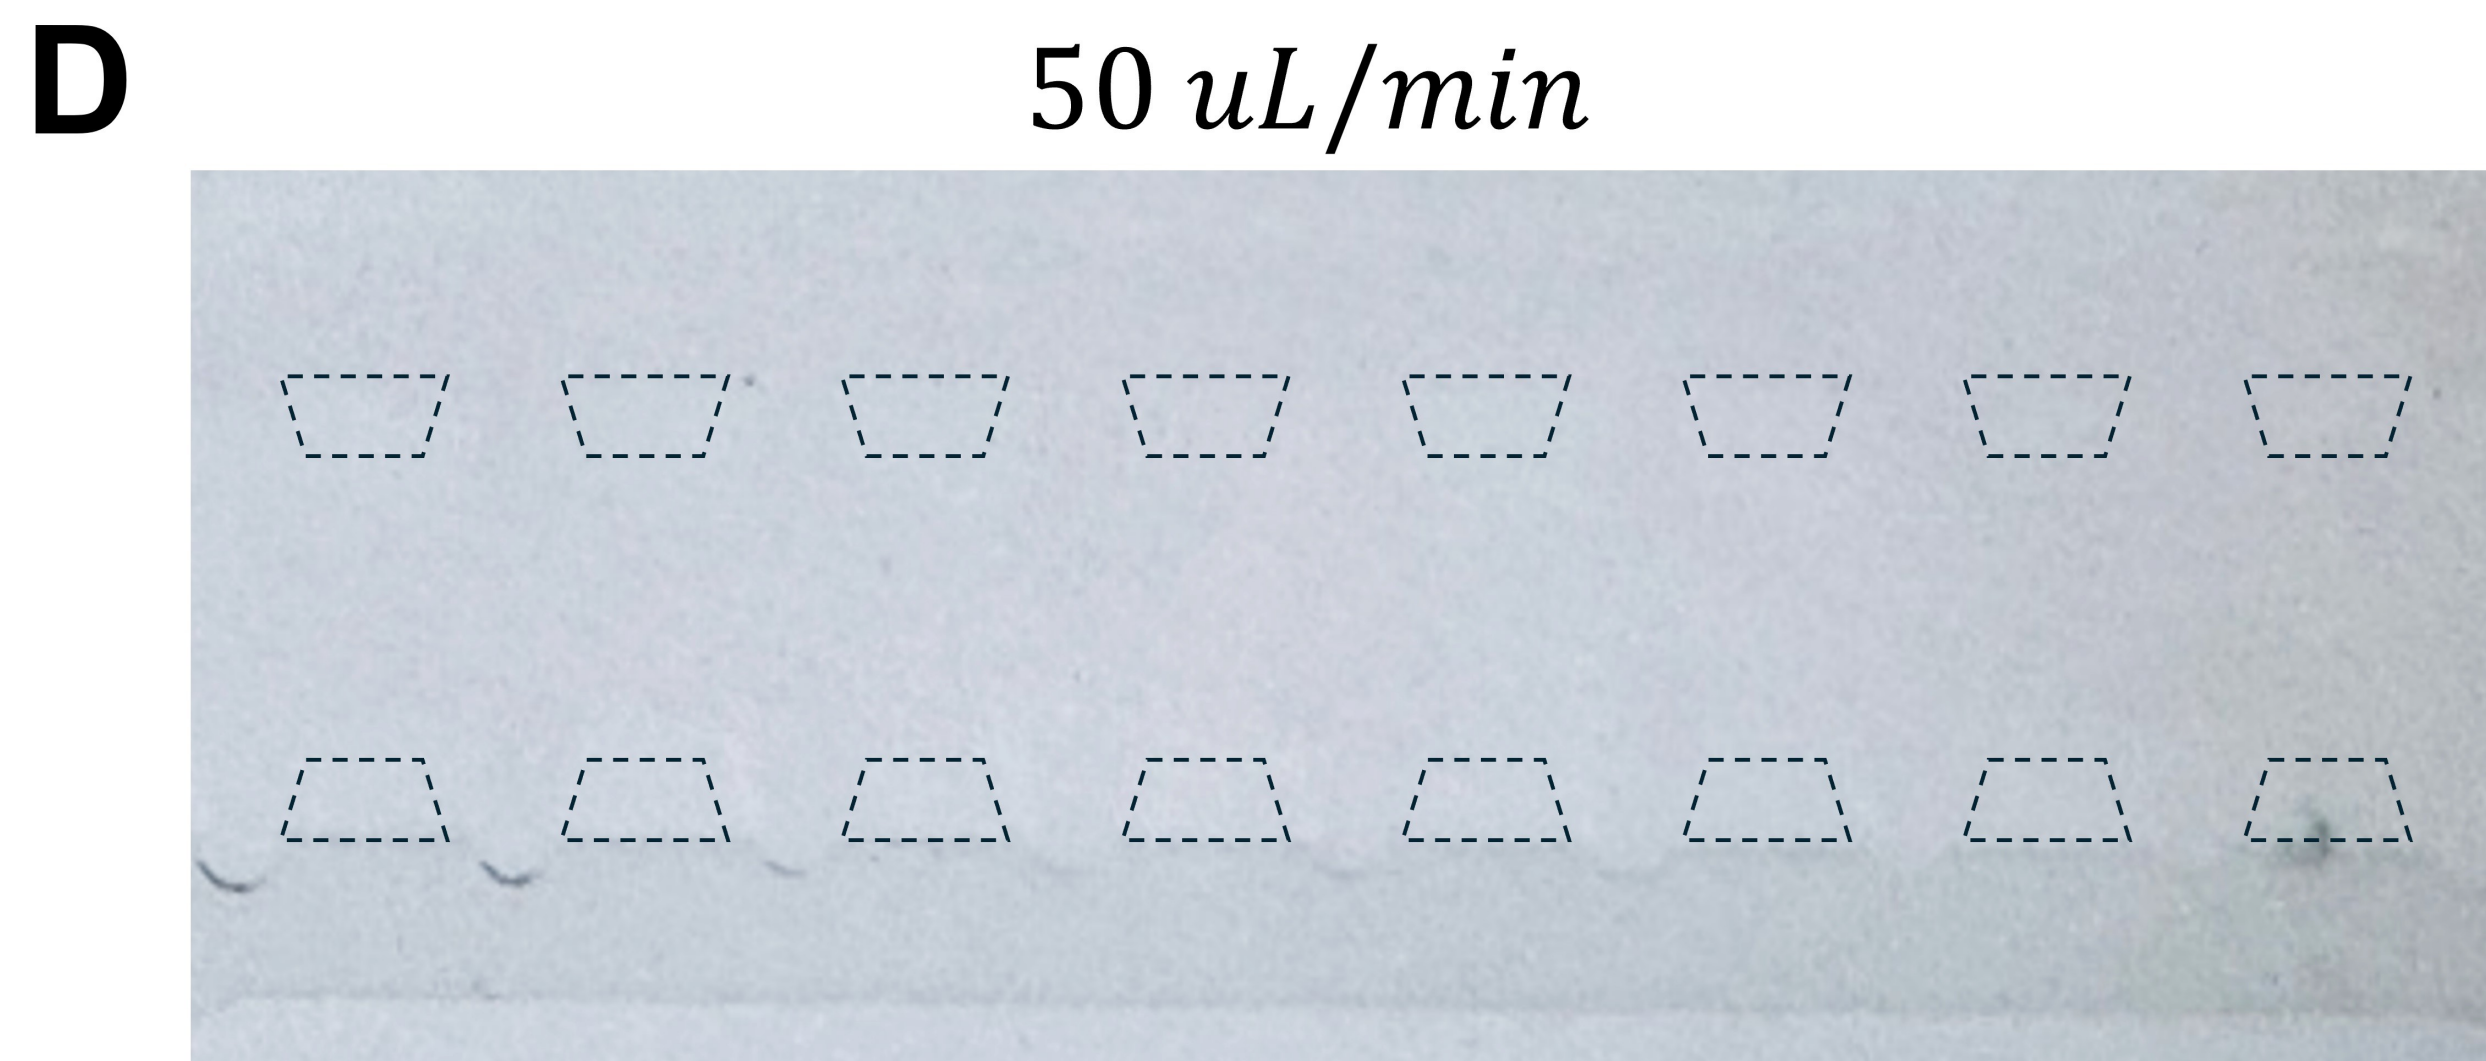

Supplement: d5lc01180a2.pdf [file d5lc01180a2.pdf]

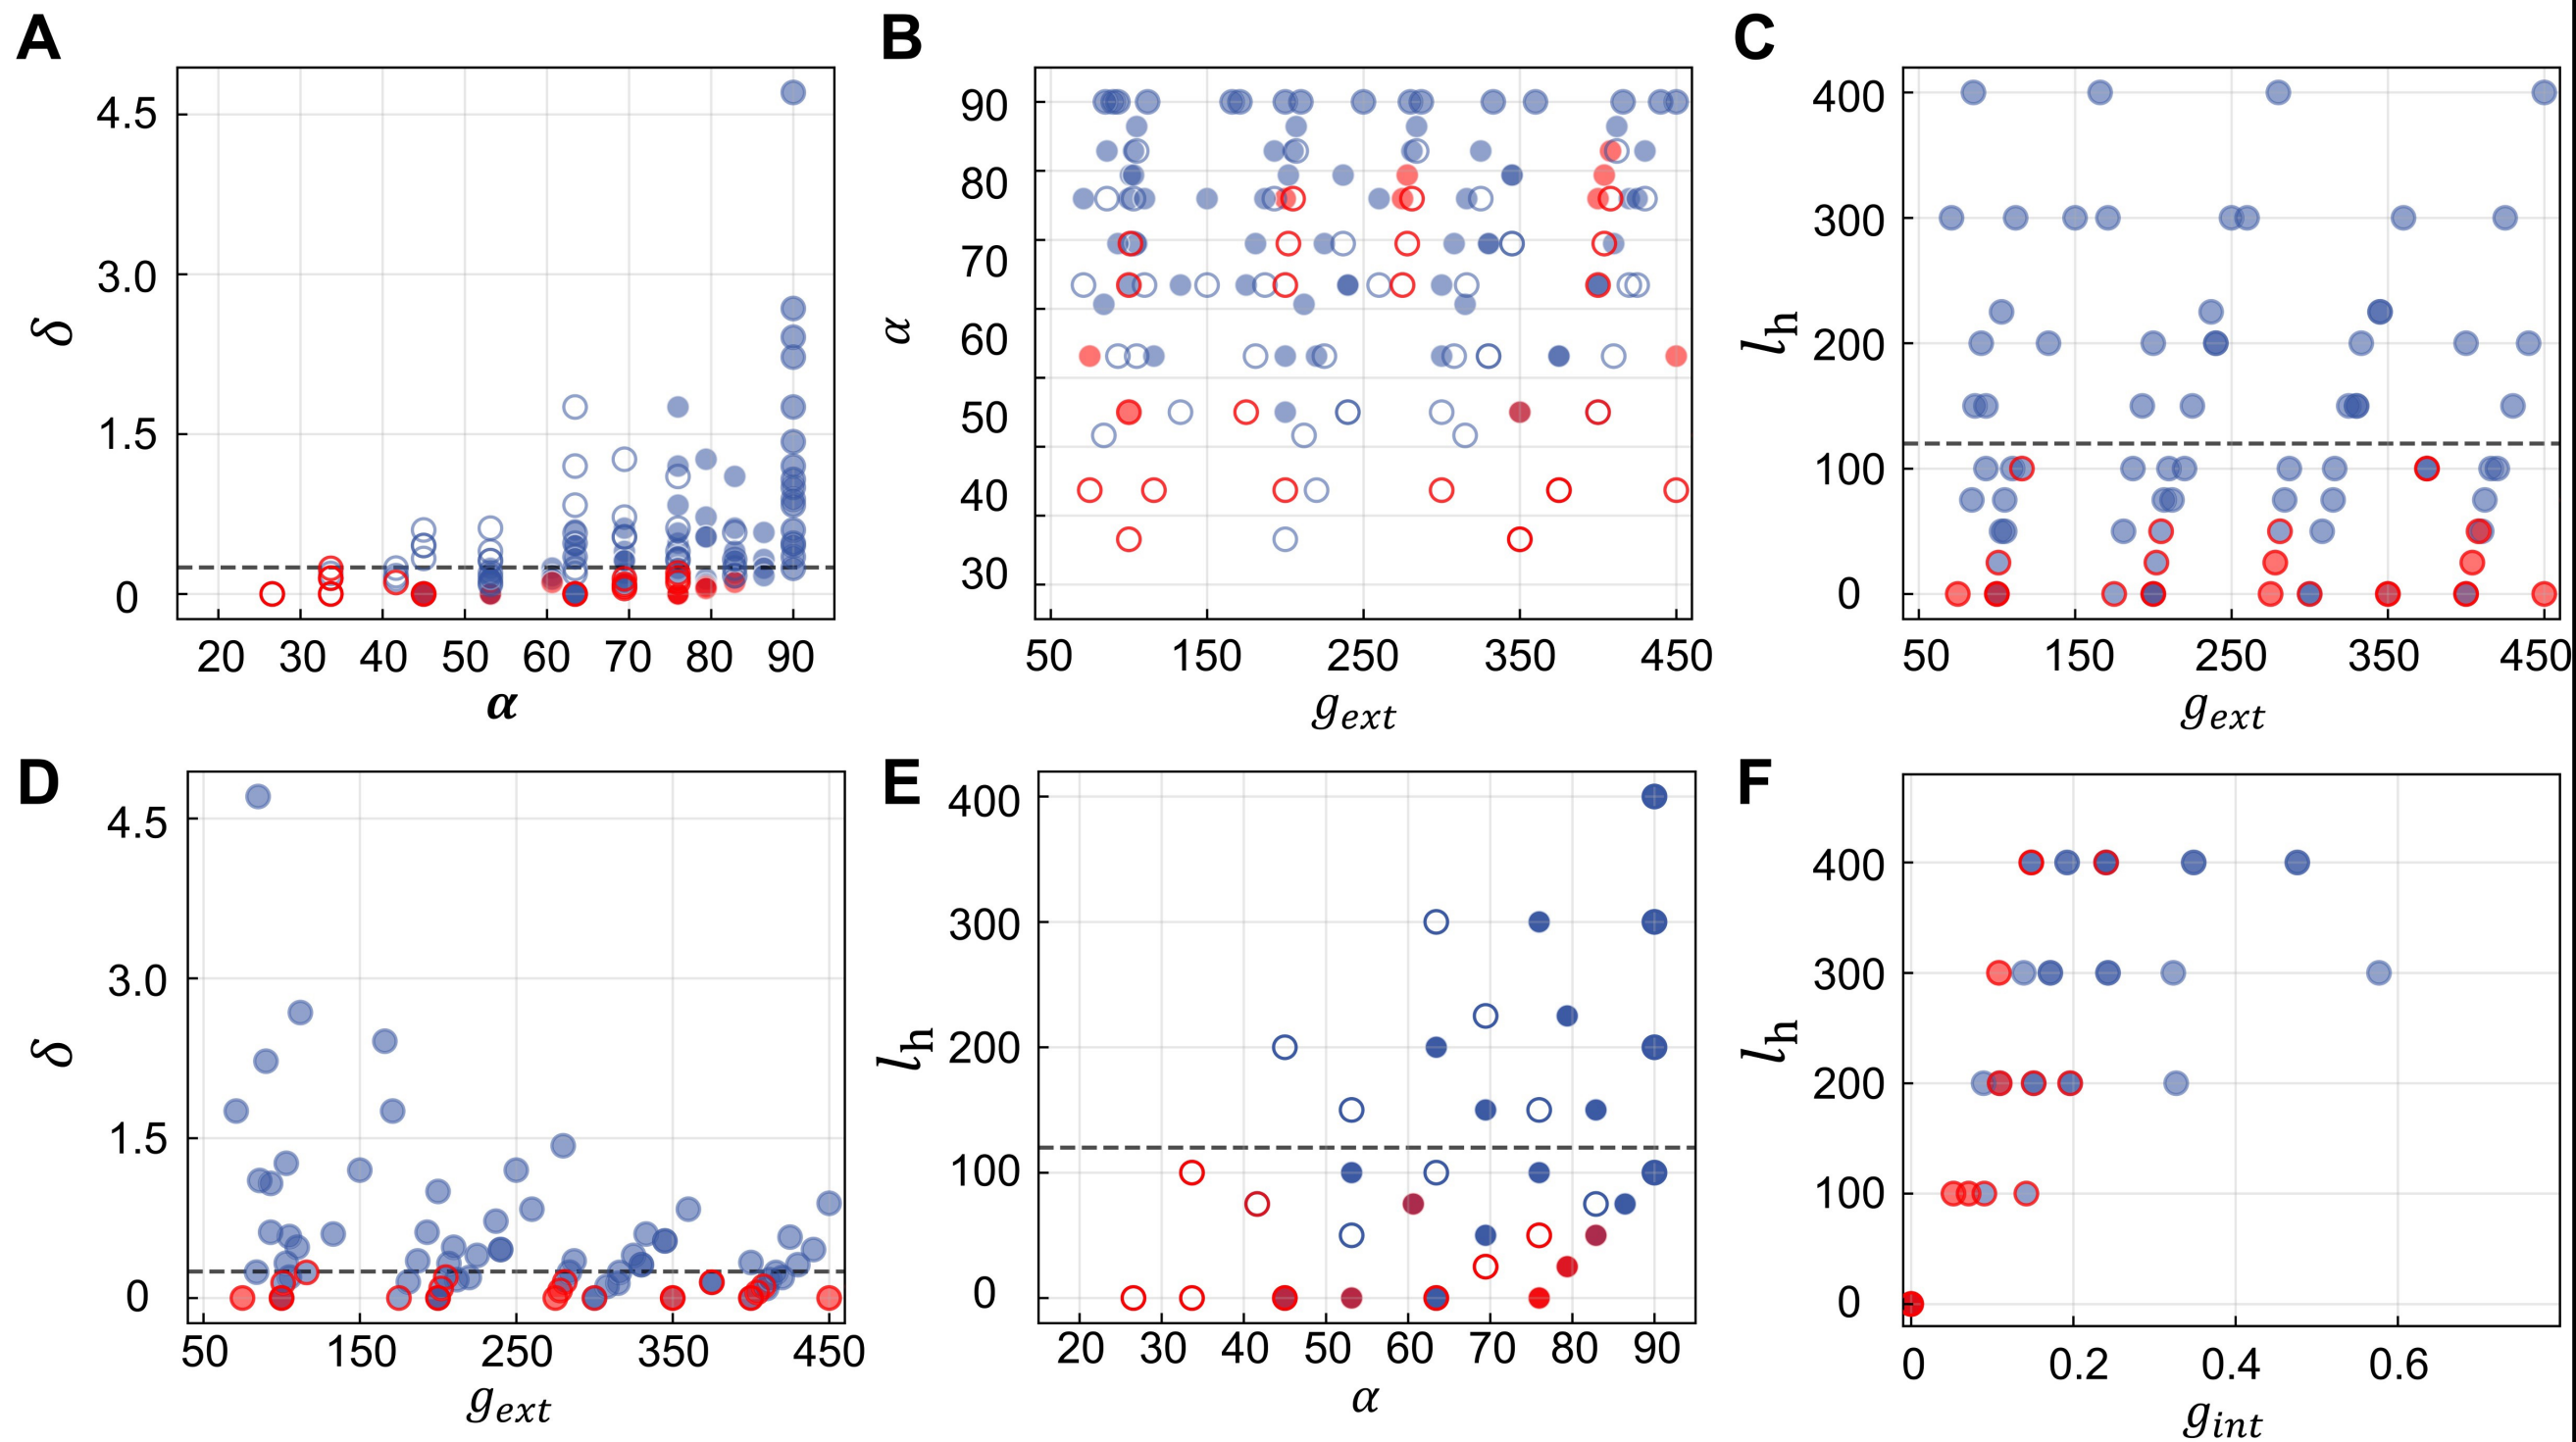

Supplement: d5lc01180a3.pdf [file d5lc01180a3.pdf]

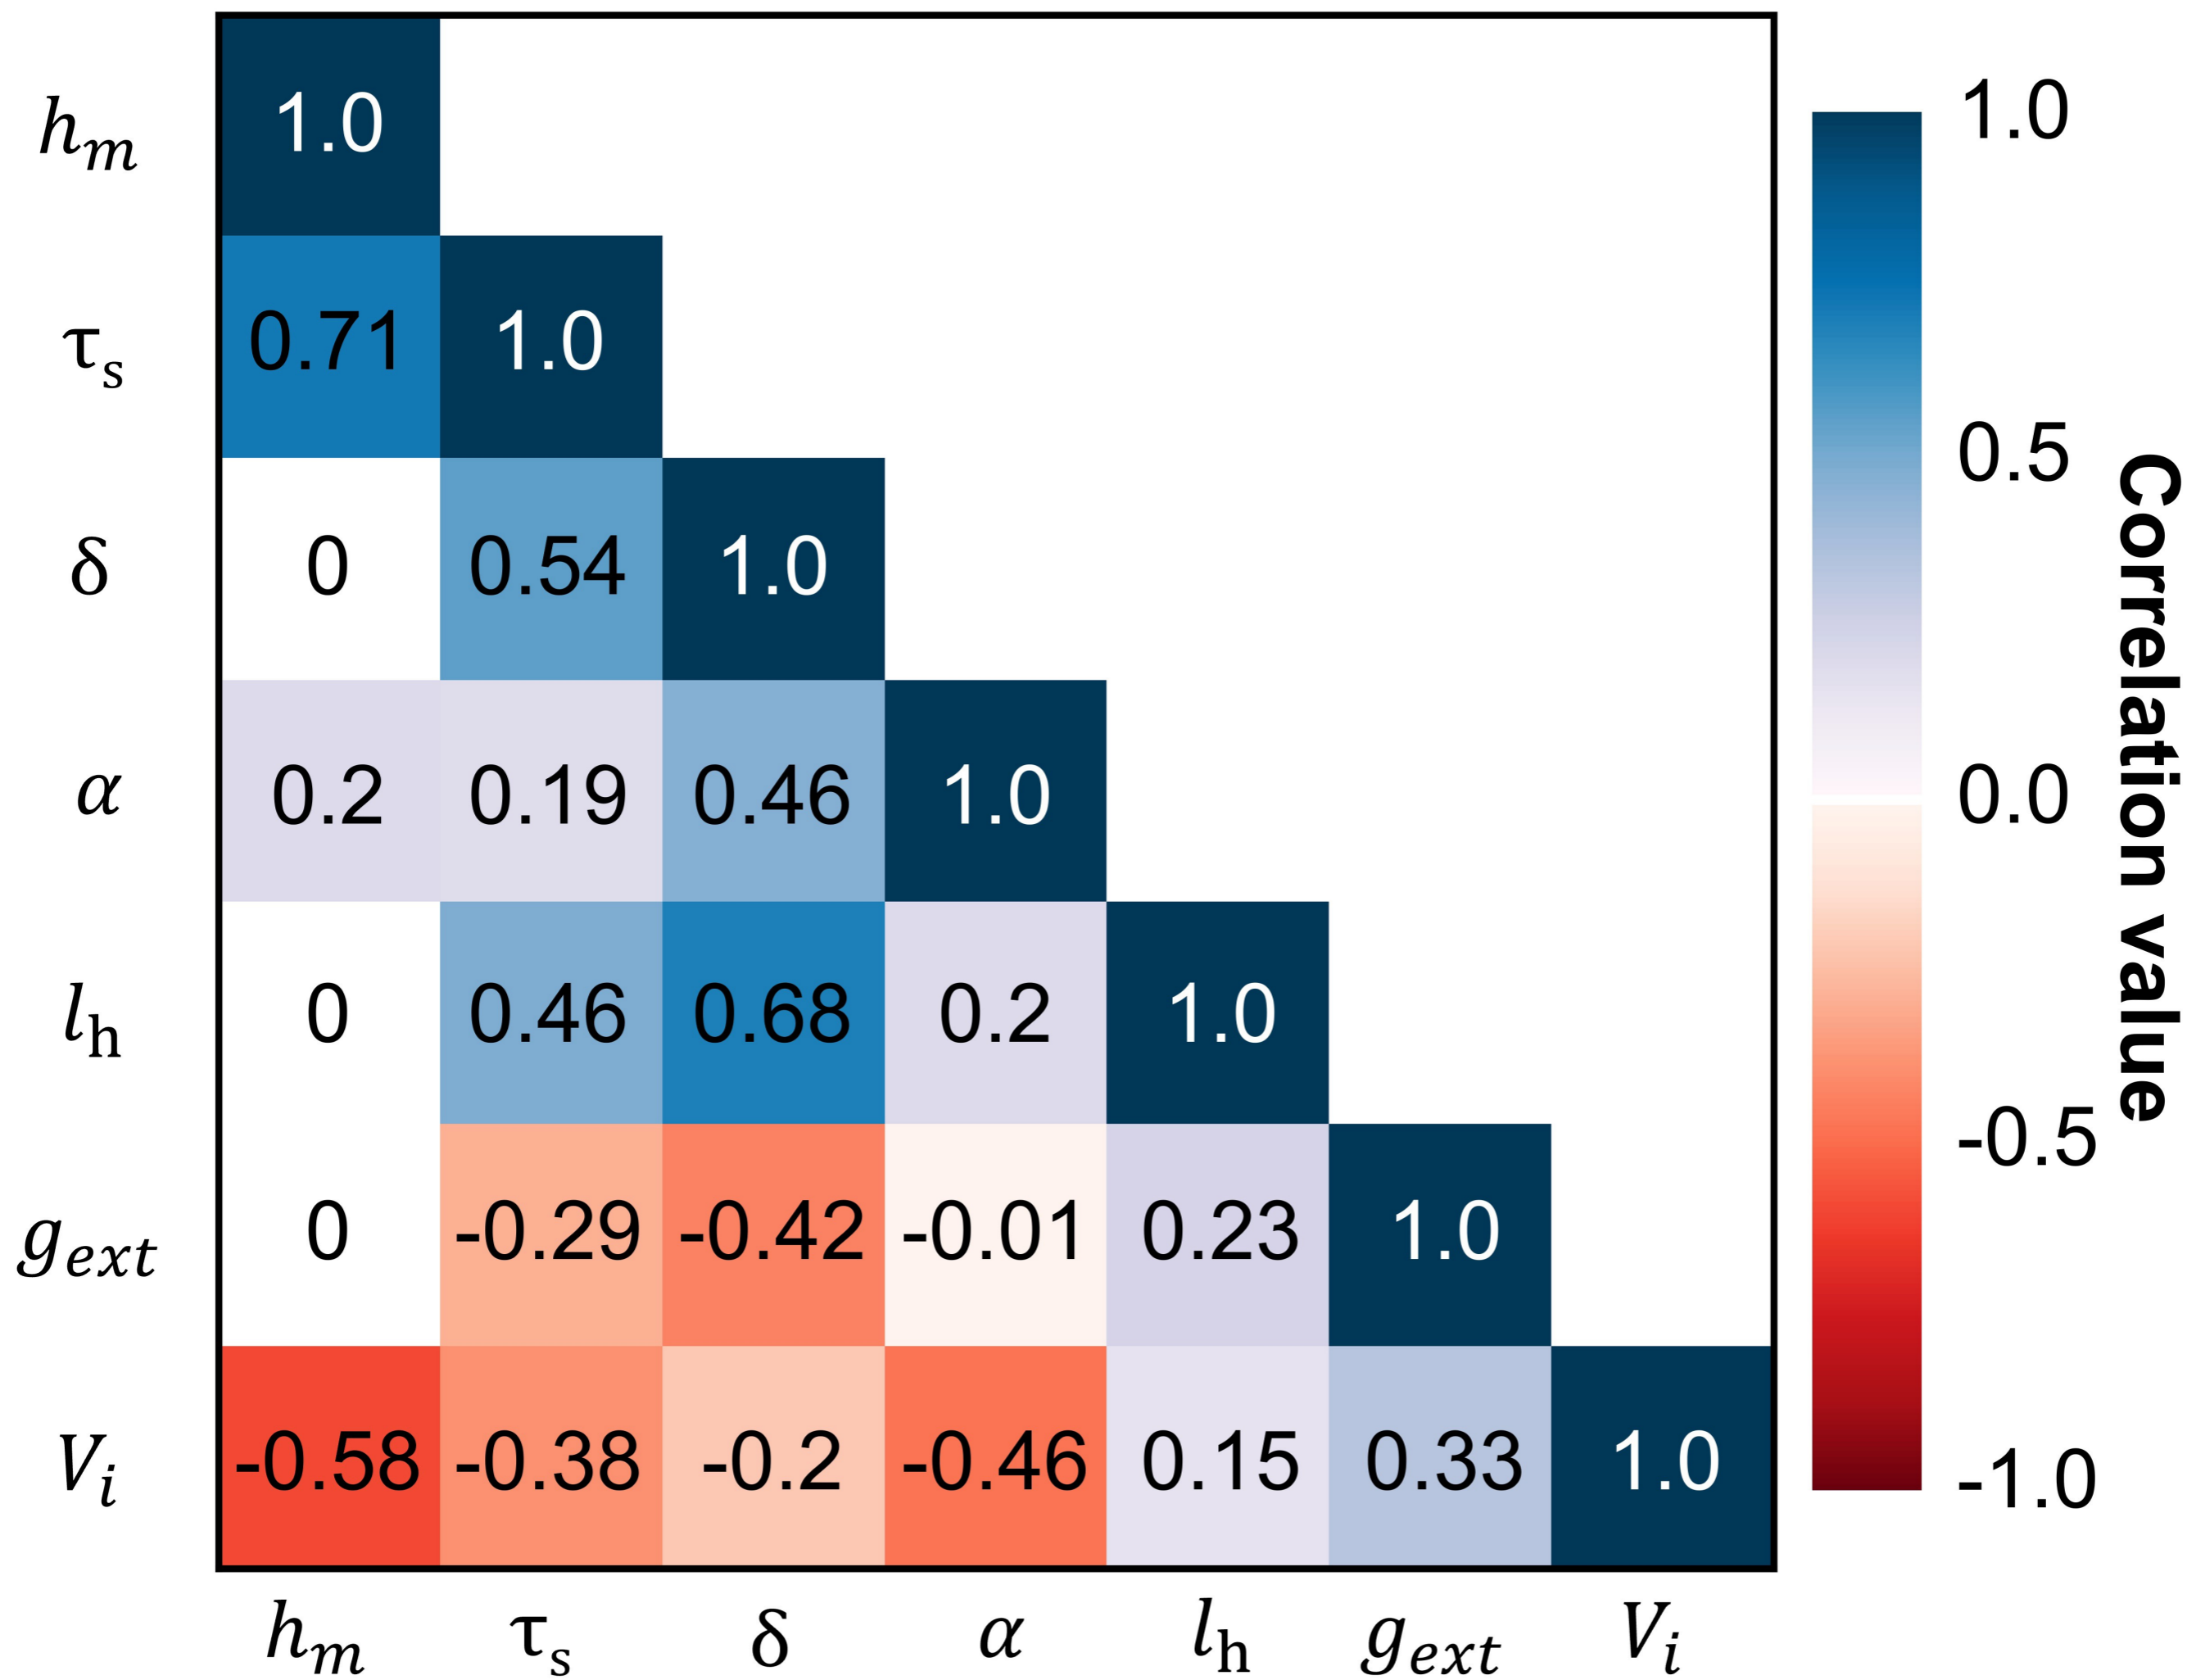

Supplement: d5lc01180a5.pdf [file d5lc01180a5.pdf]

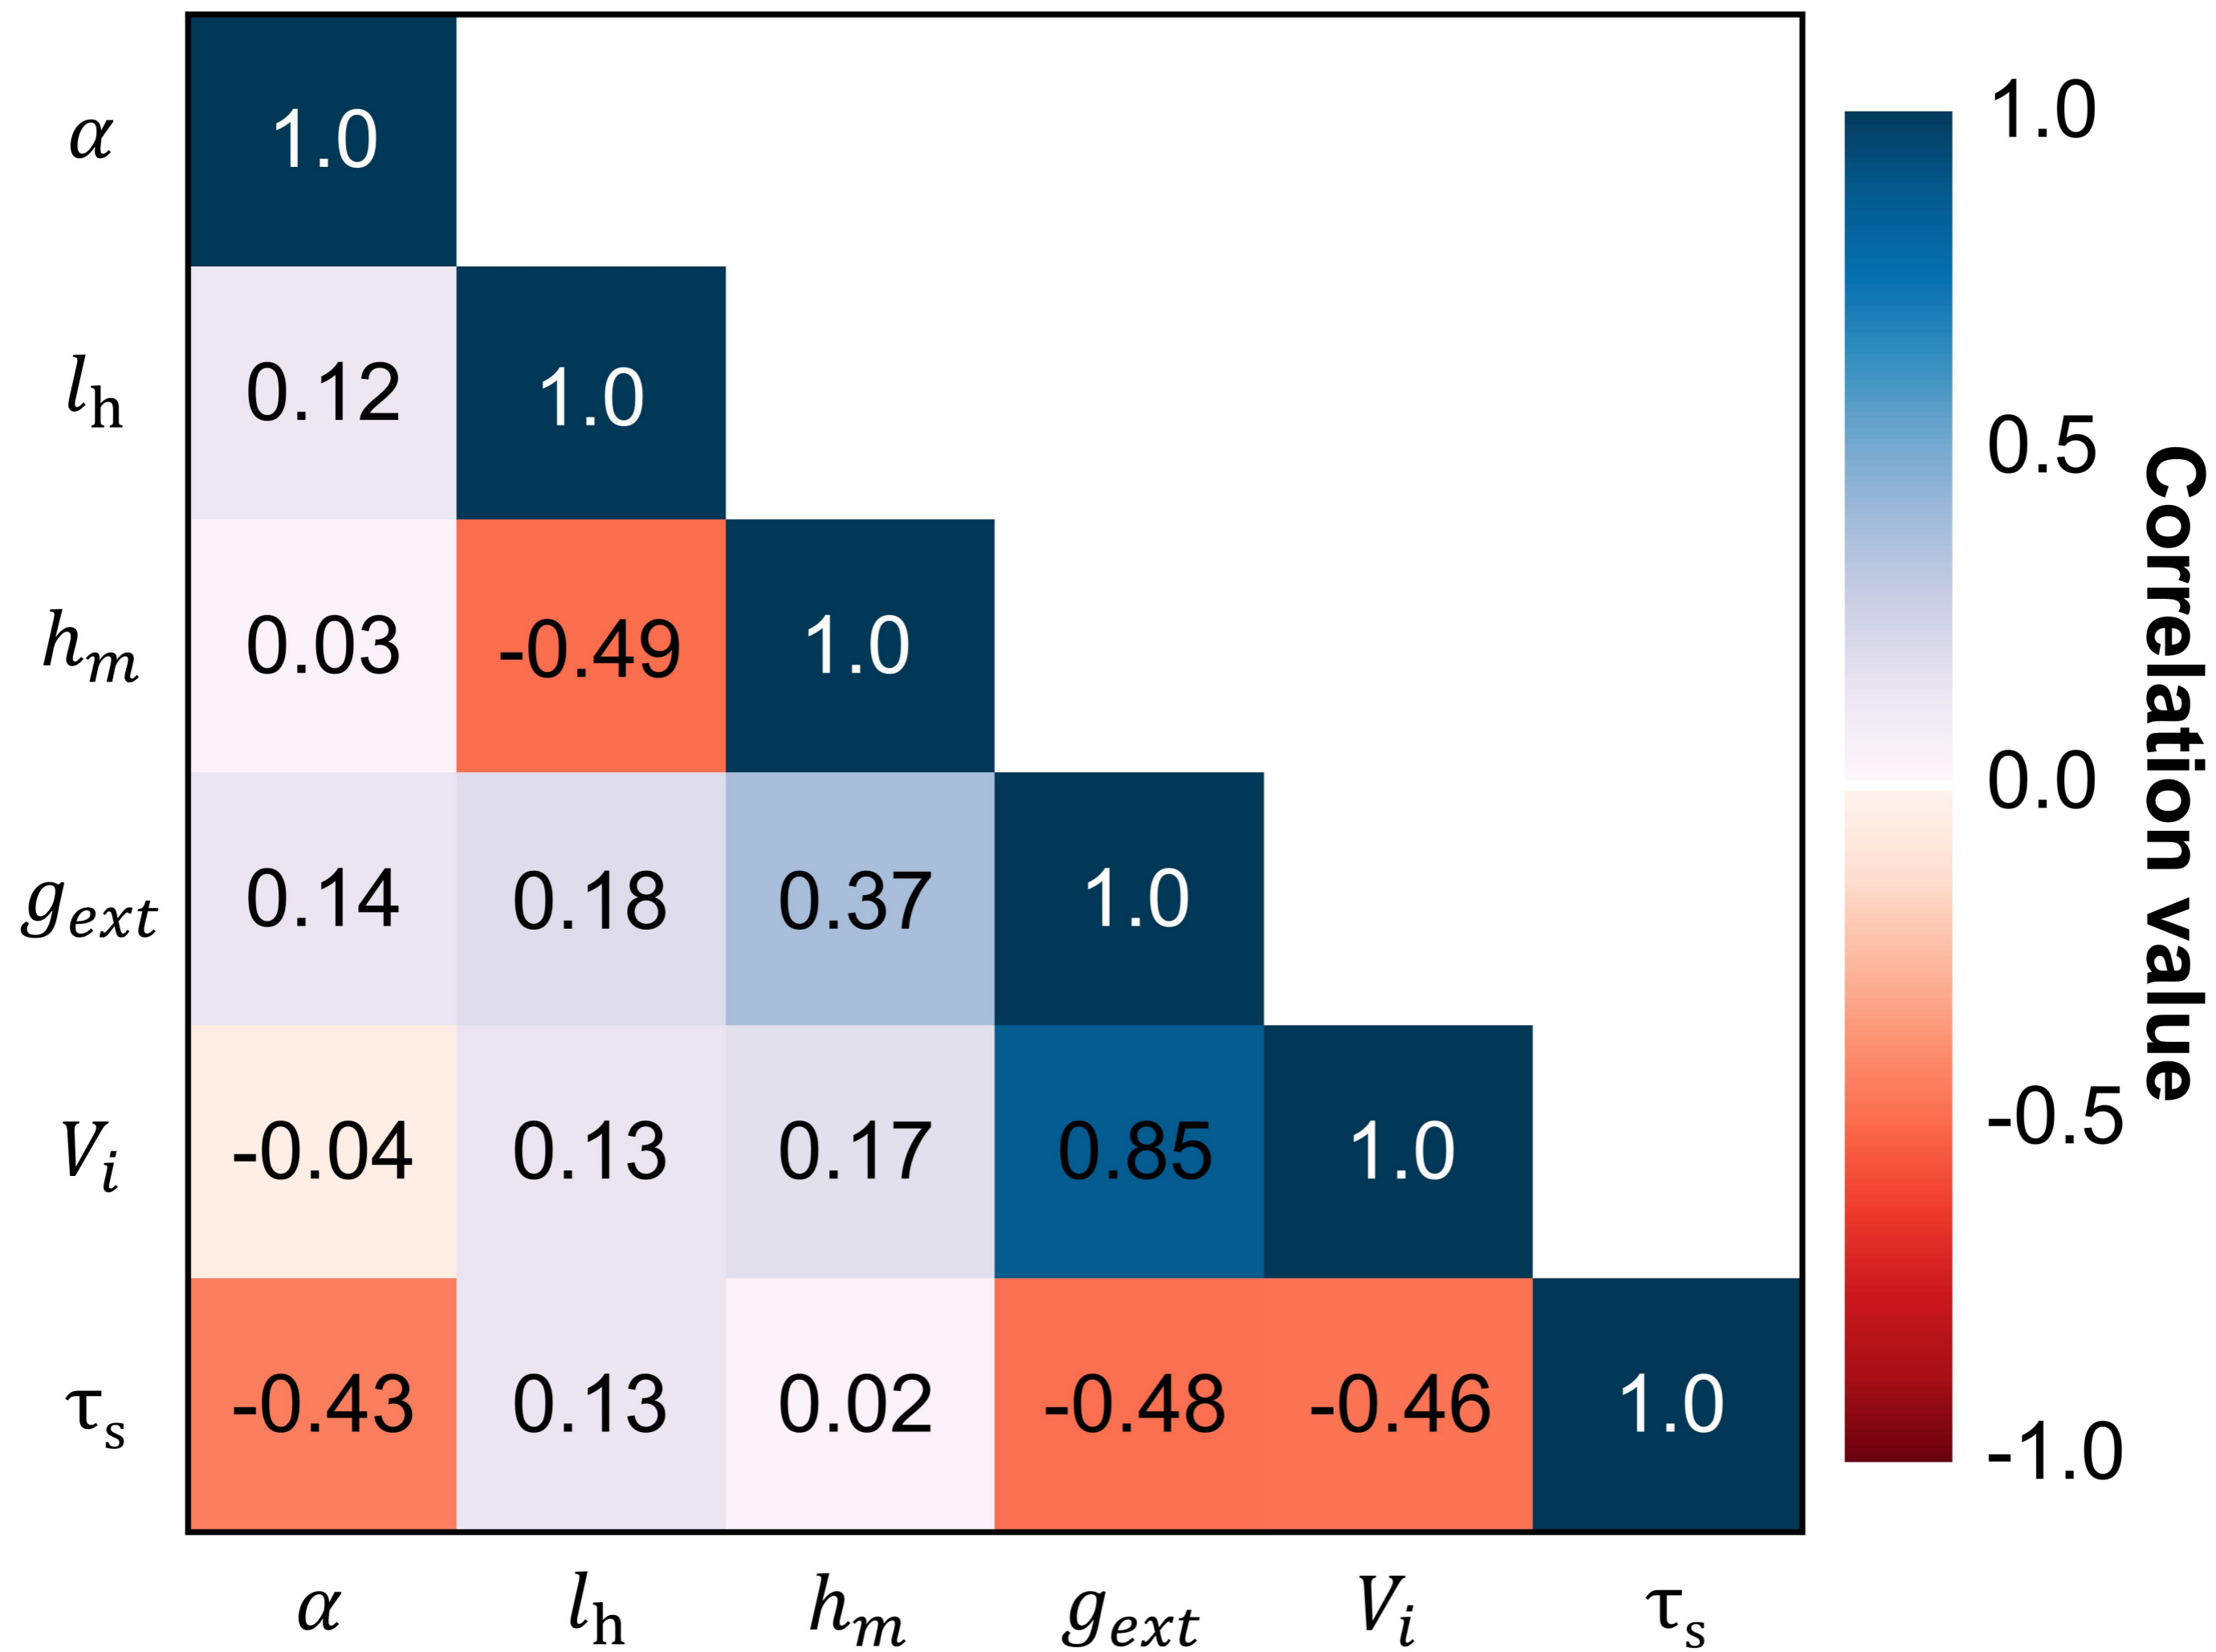

Supplement: d5lc01180a6.pdf [file d5lc01180a6.pdf]

| $\alpha$ | $l_h$ | $h_m$ | $g_{\text{ext}}$ |
|----------|-------|-------|------------------|
| 79       | 25    | 200   | 408              |

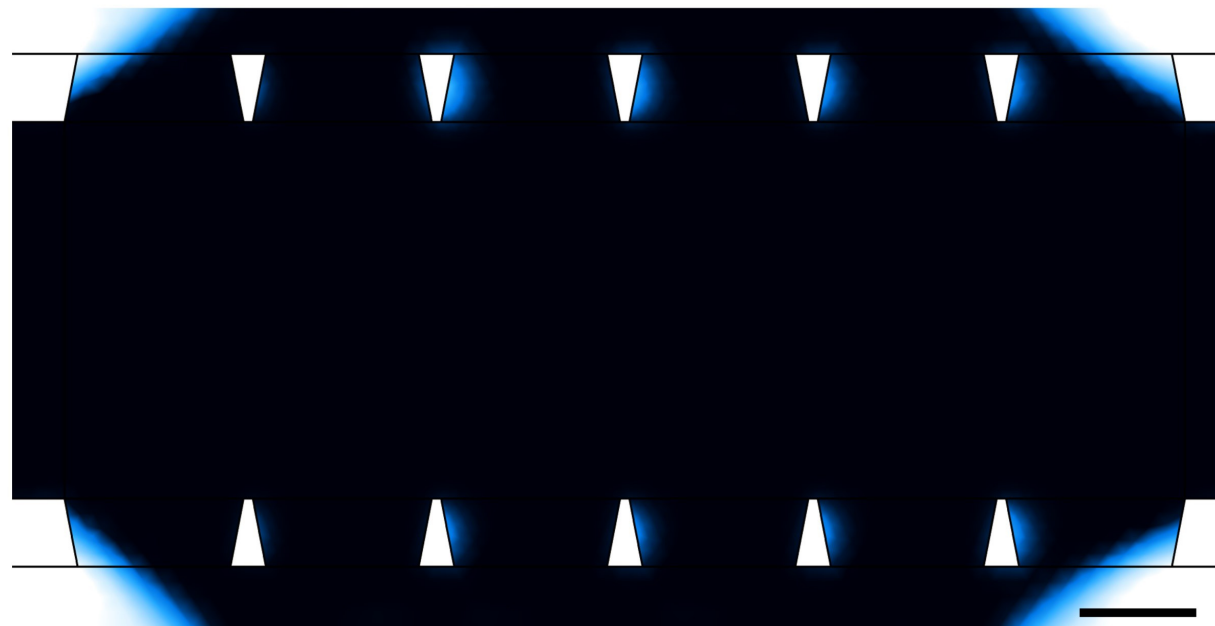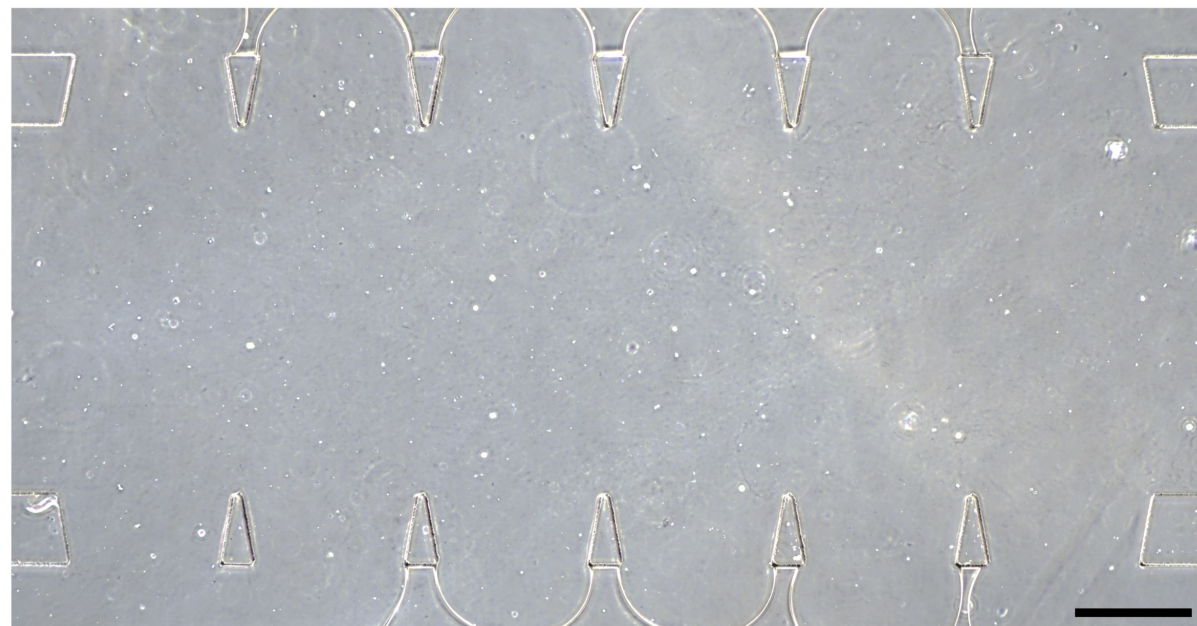

\* All scale bars are 300  $\mu\text{m}$

Supplement: d5lc01180a7.pdf [file d5lc01180a7.pdf]

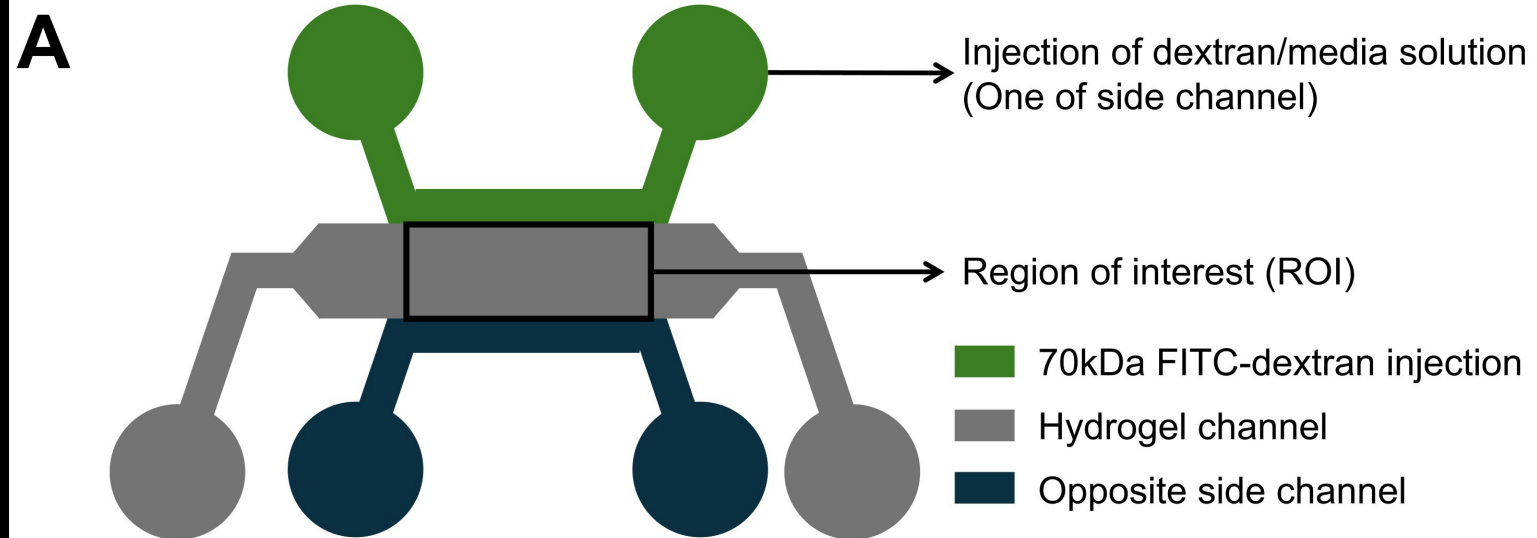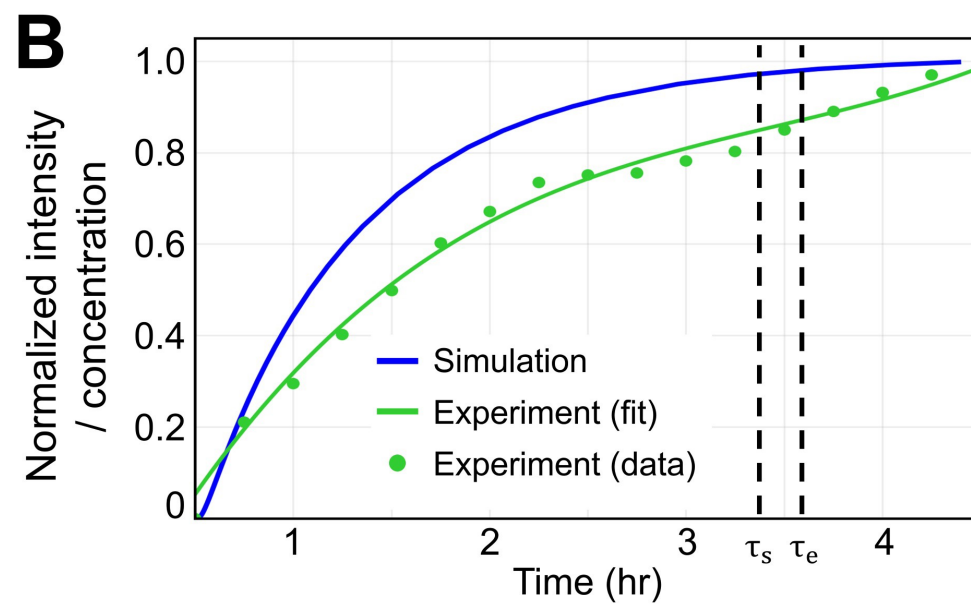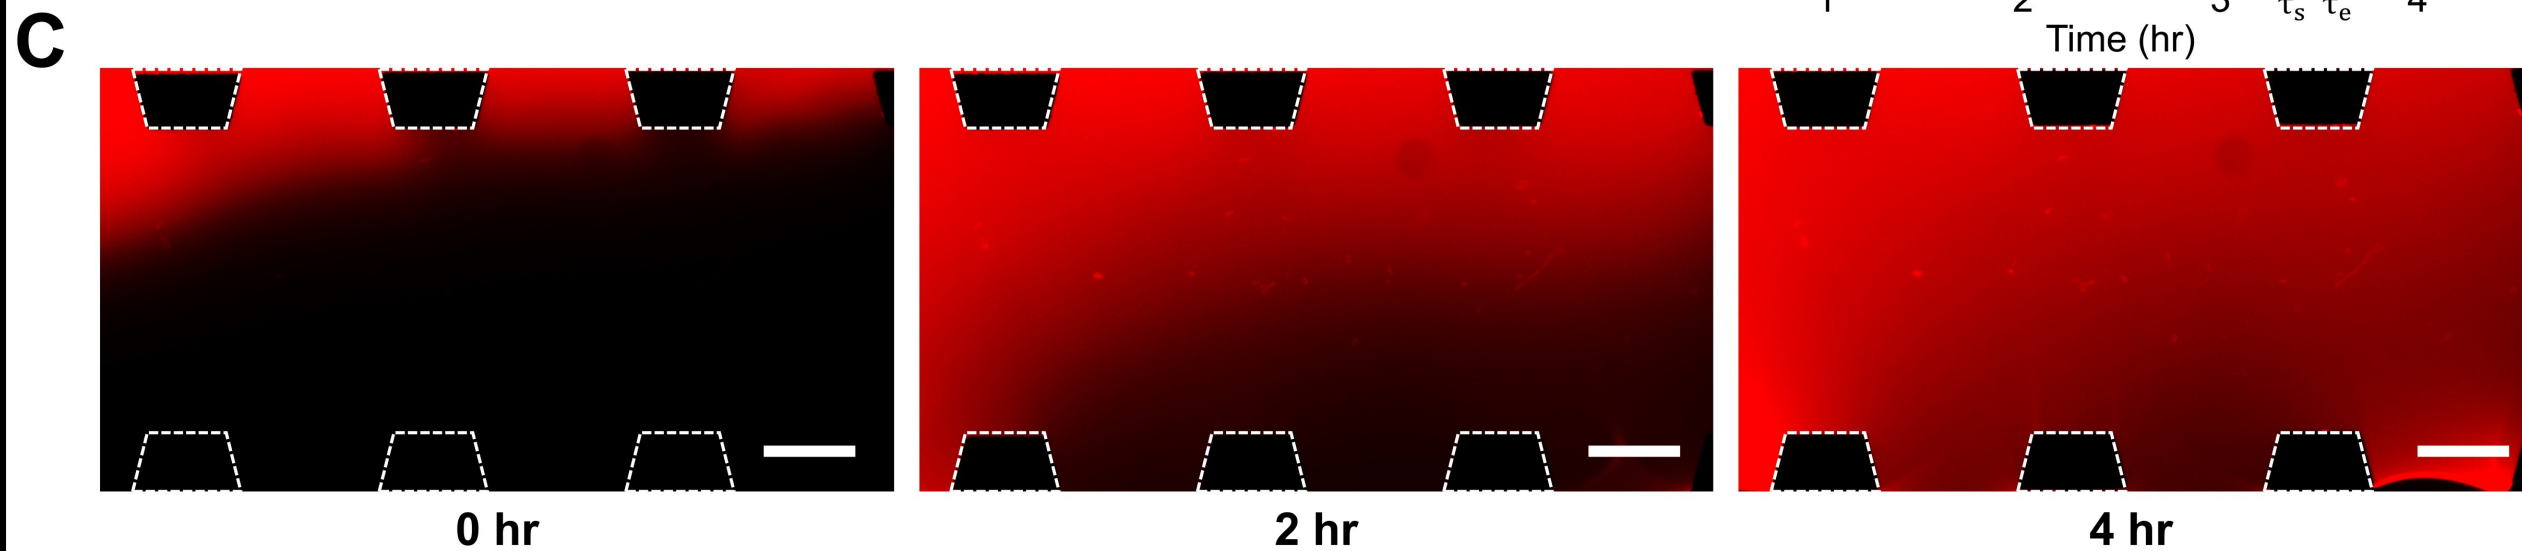

Supplement: d5lc01180a8.pdf [file d5lc01180a8.pdf]

75  $\mu\text{L}/\text{min}$

50  $\mu\text{L}/\text{min}$

25  $\mu\text{L}/\text{min}$

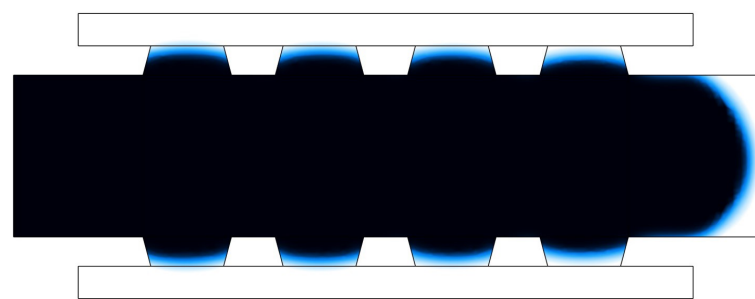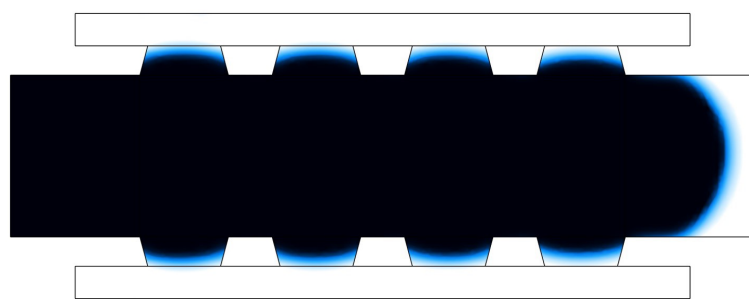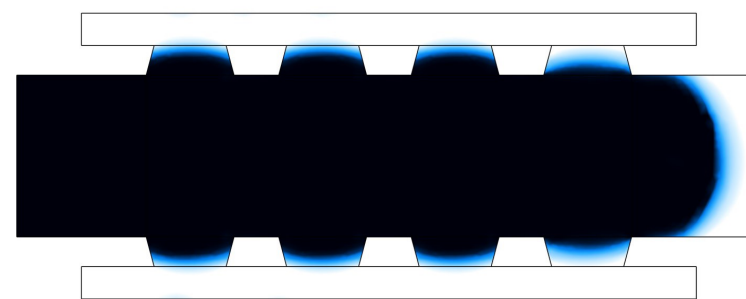

Volume fraction

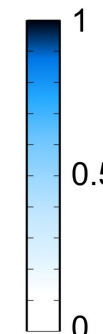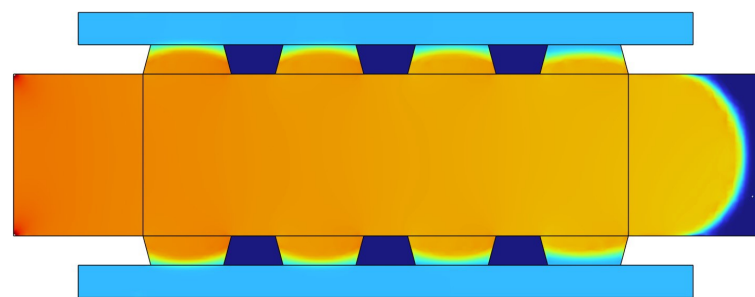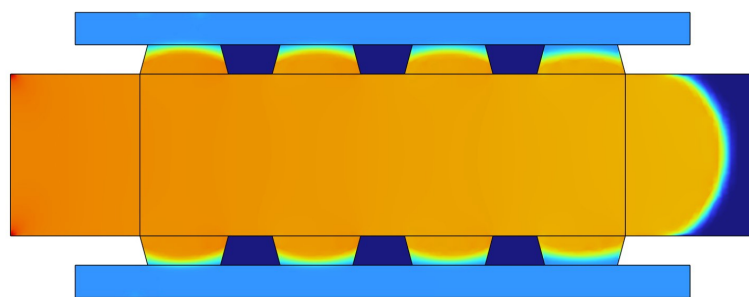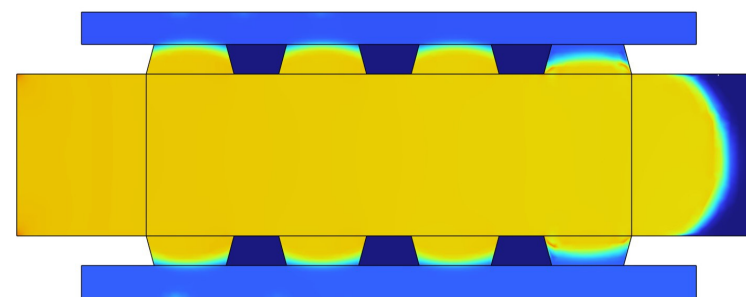

Pressure (Pa)

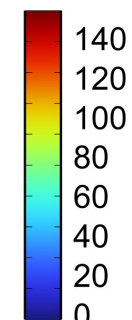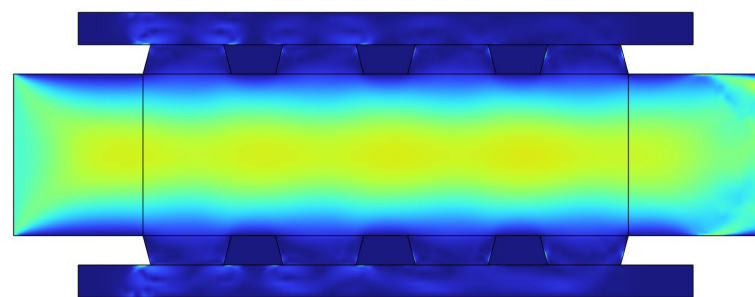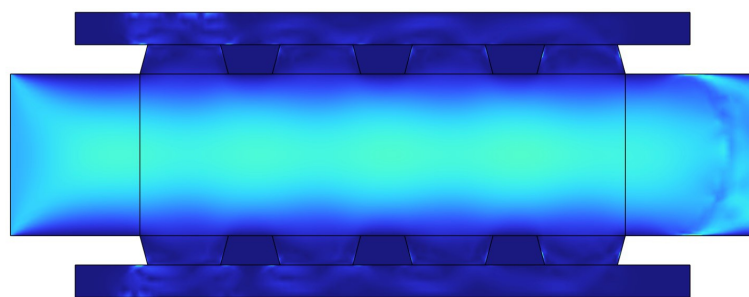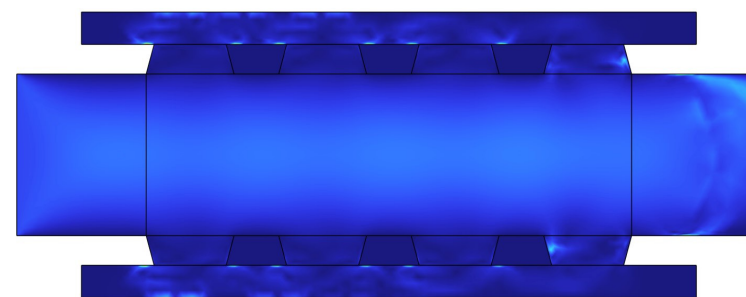

Velocity (m/s)

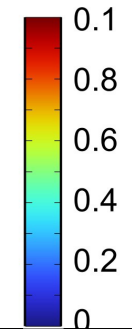

Supplement: d5lc01180a9.pdf [file d5lc01180a9.pdf]
